# Supplementary material for: Scanning atmospheric-pressure plasma jet treatment of nickel oxide with peak temperature of ∼500 °C for fabricating p–i–n structure perovskite solar cells
Source: Royal Society of Chemistry journal article supplement (doi:10.1039/d0ra01434f), 2020-01-01
Supplement: d0ra01434f1.pdf [file d0ra01434f1.pdf]

**(Supplementary Information)**

**Scanning atmospheric-pressure plasma jet treatment (with peak temperature of 500°C) on nickel oxide for p-i-n structure perovskite solar cells**

Chieh-I Lin<sup>1,2</sup>, Jui-Hsuan Tsai<sup>1,2</sup>, Jian-Zhang Chen<sup>1,2</sup>

<sup>1</sup>Graduate Institute of Applied Mechanics, National Taiwan University, Taipei City 10617, Taiwan

<sup>2</sup>Advanced Research Center for Green Materials Science and Technology, National Taiwan University, Taipei City 10617, Taiwan

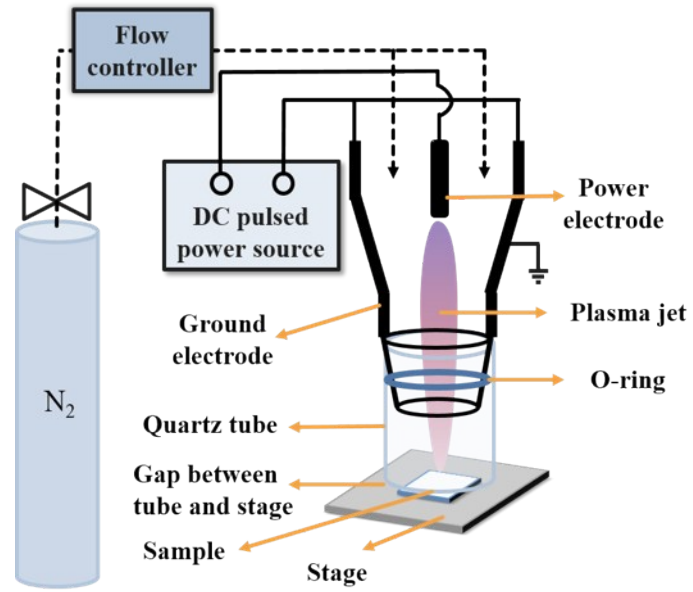

Figure S1. Schematic of APPJ setup

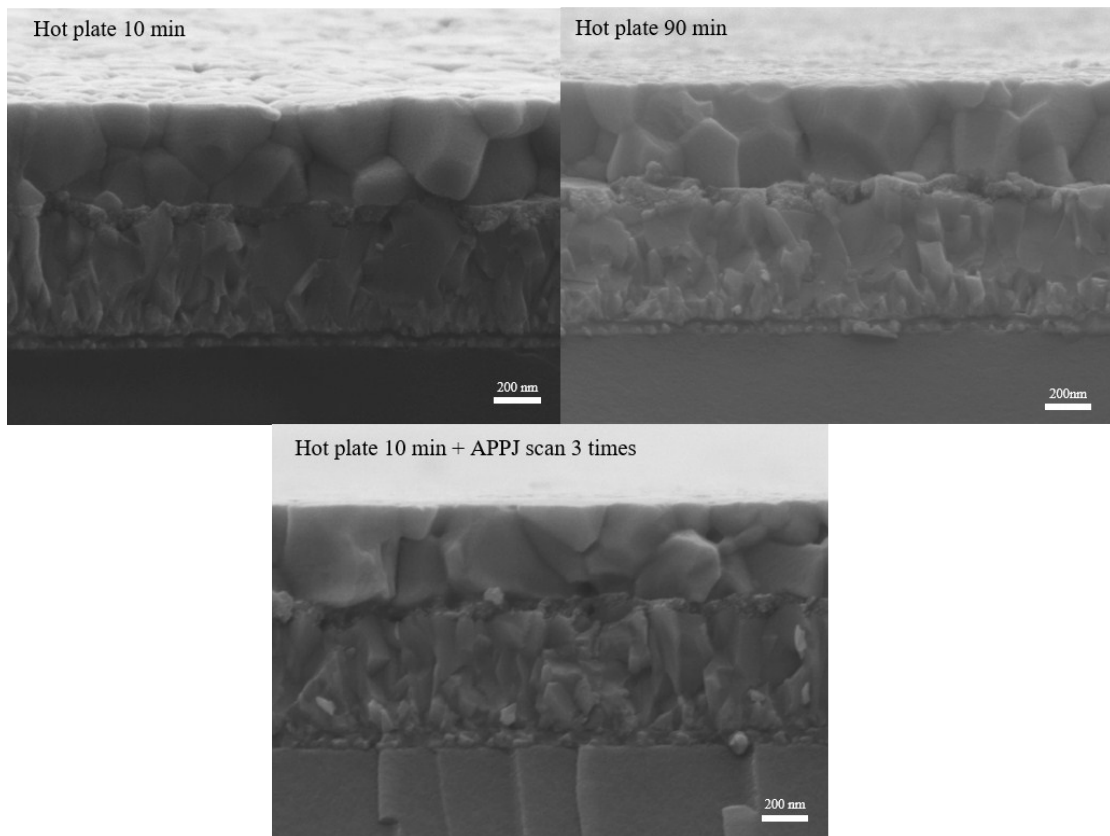

Figure S2. SEM of cross section of films.

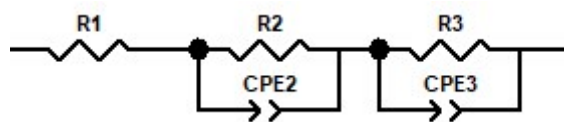

Figure S3. EIS fitting model

Table S1. XPS deconvolution for C 1s orbital.

| %                                   | C-C   | C-N   | C-O   | C=O  | C(O)O |
|-------------------------------------|-------|-------|-------|------|-------|
| Hot plate 10 min                    | 74.16 | 12.21 | 2.61  | 7.95 | 3.07  |
| Hot plate 10 min + three APPJ scans | 73.1  | 2.63  | 15.04 | 6.68 | 2.55  |
| Hot plate 90 min                    | 74.26 | 9.22  | 3.56  | 6.46 | 6.5   |

---

Table S2. XPS deconvolution for Ni 2p<sub>3/2</sub> orbital.

| %                                      | Ni   | NiO   | Ni(OH) <sub>2</sub> | NiAc <sub>2</sub> | NiOOH |
|----------------------------------------|------|-------|---------------------|-------------------|-------|
| Hot plate 10 min                       | 1.04 | 45.56 | 19.27               | 5.99              | 20.56 |
| Hot plate 10 min + three<br>APPJ scans | 0.97 | 49.3  | 20.2                | 0.83              | 22.61 |
| Hot plate 90 min                       | 0.99 | 46.99 | 20.38               | 2.41              | 22.06 |

---
